# Supplementary material for: Tissue specific expression of extracellular microRNA in human breast cancers and normal human breast tissue in vivo
Source: PubMed Central journal article supplement (PMC4673212; doi:10.18632/oncotarget.4038), 2015-05-08
Supplement: oncotarget-06-22959-s001.pdf [file oncotarget-06-22959-s001.pdf]

**Tissue specific expression of extracellular microRNA in human breast cancers and normal human breast tissue *in vivo***

**Supplementary Material**

**Table S1: Detectable extracellular miRNAs with a CT below 35 from qRT-PCR profiling of microdialysis from human breast cancer**

| <b>Detector</b> | <b>CT</b> | <b>Detector</b> | <b>CT</b> | <b>Detector</b> | <b>CT</b> |
|-----------------|-----------|-----------------|-----------|-----------------|-----------|
| hsa-let-7b-5p   | 25.670    | hsa-miR-143-3p  | 27.706    | hsa-miR-345-5p  | 31.709    |
| hsa-let-7c-5p   | 30.088    | hsa-miR-145-5p  | 27.830    | hsa-miR-363-3p  | 33.137    |
| hsa-let-7e-5p   | 33.663    | hsa-miR-146a-5p | 25.432    | hsa-miR-365a-3p | 30.452    |
| hsa-miR-10a-5p  | 30.135    | hsa-miR-146b-5p | 26.519    | hsa-miR-367-3p  | 27.342    |
| hsa-miR-16-5p   | 22.343    | hsa-miR-148a-3p | 30.831    | hsa-miR-374a-5p | 30.419    |
| hsa-miR-17-5p   | 25.889    | hsa-miR-150-5p  | 29.918    | hsa-miR-375     | 30.543    |
| hsa-miR-19b-3p  | 24.124    | hsa-miR-152-3p  | 29.380    | hsa-miR-376c-3p | 31.503    |
| hsa-miR-19a-3p  | 27.414    | hsa-miR-155     | 24.783    | hsa-miR-376a-3p | 34.019    |
| hsa-miR-20a-5p  | 26.045    | hsa-miR-185-5p  | 30.664    | hsa-miR-423-5p  | 33.528    |
| hsa-miR-20b-5p  | 28.889    | hsa-miR-186-5p  | 25.967    | hsa-miR-425-5p  | 25.299    |
| hsa-miR-21-5p   | 26.151    | hsa-miR-187-3p  | 28.944    | hsa-miR-449b-5p | 34.145    |
| hsa-miR-24-3p   | 25.278    | hsa-miR-191-5p  | 27.863    | hsa-miR-451a    | 25.836    |
| hsa-miR-25-3p   | 28.784    | hsa-miR-192-5p  | 28.139    | hsa-miR-452-5p  | 31.622    |
| hsa-miR-26b-5p  | 29.165    | hsa-miR-193b-3p | 26.270    | hsa-miR-454-3p  | 31.690    |
| hsa-miR-26a-5p  | 31.482    | hsa-miR-193a-5p | 31.811    | hsa-miR-455-3p  | 34.938    |
| hsa-miR-27a-3p  | 29.698    | hsa-miR-194-5p  | 33.885    | hsa-miR-483-5p  | 28.365    |
| hsa-miR-27b-3p  | 32.516    | hsa-miR-195-5p  | 26.680    | hsa-miR-484     | 25.017    |
| hsa-miR-28-3p   | 30.561    | hsa-miR-196b-5p | 31.835    | hsa-miR-485-5p  | 24.716    |
| hsa-miR-29a-3p  | 27.108    | hsa-miR-197-3p  | 27.480    | hsa-miR-491-5p  | 33.427    |
| hsa-miR-29c-3p  | 29.790    | hsa-miR-199a-3p | 27.101    | hsa-miR-511-5p  | 32.151    |
| hsa-miR-30c-5p  | 28.624    | hsa-miR-200c-3p | 27.912    | hsa-miR-518f-3p | 31.570    |
| hsa-miR-30b-5p  | 34.148    | hsa-miR-200b-3p | 30.379    | hsa-miR-523-3p  | 27.686    |
| hsa-miR-34a-5p  | 30.267    | hsa-miR-200a-3p | 32.255    | hsa-miR-532-5p  | 30.350    |
| hsa-miR-92a-3p  | 26.810    | hsa-miR-202-3p  | 29.982    | hsa-miR-532-3p  | 32.176    |
| hsa-miR-93-5p   | 28.241    | hsa-miR-203a    | 31.259    | hsa-miR-539-5p  | 33.631    |
| hsa-miR-96-5p   | 31.244    | hsa-miR-204-5p  | 34.861    | hsa-miR-548a-3p | 34.355    |
| hsa-miR-99a-5p  | 30.178    | hsa-miR-208-3p  | 31.515    | hsa-miR-574-3p  | 26.514    |
| hsa-miR-100-5p  | 28.615    | hsa-miR-208b-3p | 34.706    | hsa-miR-590-5p  | 29.065    |
| hsa-miR-101-3p  | 33.727    | hsa-miR-214-3p  | 28.951    | hsa-miR-598-3p  | 33.063    |
| hsa-miR-106a-5p | 26.006    | hsa-miR-218-5p  | 29.025    | hsa-miR-618     | 31.111    |
| hsa-miR-106b-5p | 29.439    | hsa-miR-221-3p  | 31.273    | hsa-miR-628-5p  | 23.304    |
| hsa-miR-125b-5p | 27.584    | hsa-miR-222-3p  | 24.622    | hsa-miR-636     | 31.253    |
| hsa-miR-126-3p  | 25.243    | hsa-miR-223-3p  | 21.520    | hsa-miR-660-5p  | 34.957    |
| hsa-miR-130a-3p | 31.267    | hsa-miR-224-5p  | 29.369    | hsa-miR-708-5p  | 31.845    |
| hsa-miR-130b-3p | 34.310    | hsa-miR-302a-3p | 26.717    | hsa-miR-875-3p  | 30.544    |
| hsa-miR-132-3p  | 29.075    | hsa-miR-320a    | 25.454    | hsa-miR-886-5p  | 33.881    |
| hsa-miR-133a-3p | 33.064    | hsa-miR-324-3p  | 31.647    |                 |           |

|                |        |                |        |
|----------------|--------|----------------|--------|
| hsa-miR-134-5p | 31.360 | hsa-miR-328-3p | 30.215 |
| hsa-miR-139-5p | 31.625 | hsa-miR-331-3p | 32.004 |
| hsa-miR-140-5p | 28.831 | hsa-miR-331-5p | 32.125 |
| hsa-miR-140-3p | 31.062 | hsa-miR-335-5p | 30.169 |
| hsa-miR-141-3p | 32.085 | hsa-miR-339-3p | 32.826 |
| hsa-miR-142-3p | 31.409 | hsa-miR-340-5p | 32.048 |
| hsa-miR-142-5p | 31.802 | hsa-miR-342-3p | 27.565 |

**Table S2: Mature miRNAs assayed on human microdialysates and plasma samples mapped to miRBase version V20**

| <b>Mature ID</b> | <b>Mature miRNA Sequence</b> |
|------------------|------------------------------|
| hsa-miR-16-5p    | UAGCAGCACGUAAAUAUUGGCG       |
| hsa-miR-19b-3p   | UGUGCAAUCCAUGCAAACUGA        |
| hsa-miR-21-5p    | UAGCUUAUCAGACUGAUGUUGA       |
| hsa-miR-29a-3p   | UAGCACCAUCUGAAAUCGGUUA       |
| hsa-miR-30c-5p   | UGUAAACAUCCUACACUCUCAGC      |
| hsa-miR-146a-5p  | UGAGAACUGAAUCCAUGGGUU        |
| hsa-miR-148a-3p  | UCAGUGCACUACAGAACUUUGU       |
| hsa-miR-193b     | AACUGGCCCUCAAAGUCCCGCU       |
| hsa-miR-203a     | GUGAAAUGUUUAGGACCACUAG       |
| hsa-miR-451a     | AAACCGUUACCAUUACUGAGUU       |
| hsa-miR-452-5p   | AACUGUUUGCAGAGGAAACUGA       |
| cel-miR-67-3p    | UCACAACCUCCUAGAAAGAGUAGA     |

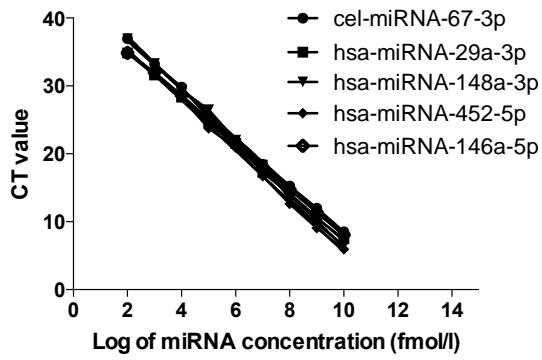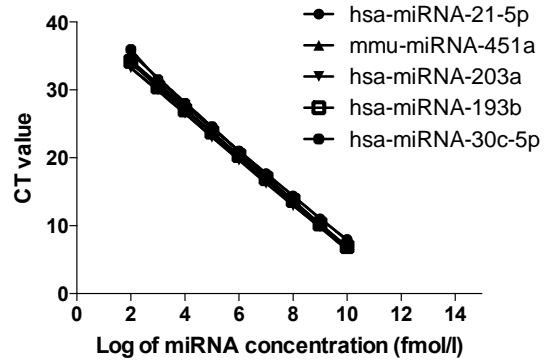

**Figure S1: Standard curves for quantification of human miRNAs.**

Standard curves were generated for every miRNA by using a dilution of a known concentration of synthetic miRNAs. The real-time PCR showed a broad dynamic range with a correlation coefficient ranging from 0.9982 to 0.9998.

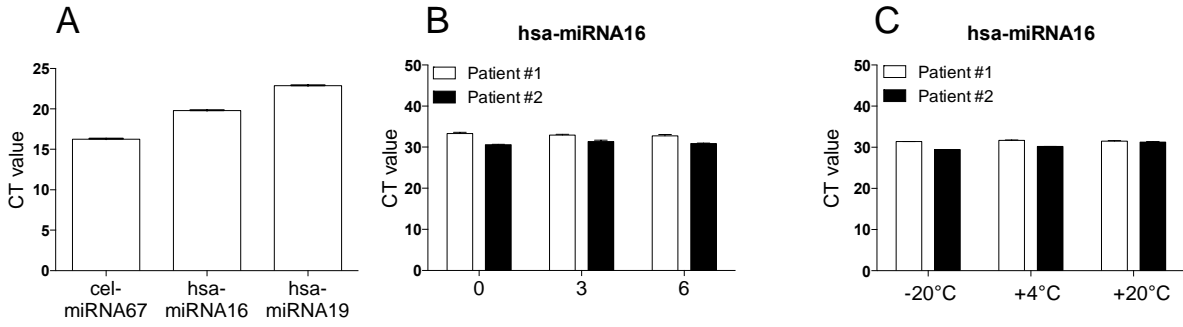

**Figure S2: High stability and low extraction variability of microRNAs in microdialysis samples.**

A. Extraction variability of miRNAs in microdialysates of extracted and pre-amplified endogenous miRNAs and spike in control, n=6 in each group.

B. Stability of miRNAs without extraction and pre-amplification in microdialysis samples subjected to 0, 3, and 6 freeze-thaw cycles, n=3 in each group.

C. Stability of miRNAs without extraction and pre-amplification in microdialysis samples subjected to -20°C, +4°C or +20°C for 24 hours, n=3 in each group.
